1           **Does healthy lifestyle attenuate the detrimental effects of urinary polycyclic**  
2                           **aromatic hydrocarbons on phenotypic aging?**  
3                           **An analysis from NHANES 2001–2010**

4  
5           Zhenqing Yang<sup>1#</sup>, Fan Pu<sup>1#</sup>, Xingqi Cao<sup>1</sup>, Xueqin Li<sup>1</sup>, Sudan Sun<sup>1</sup>, Jingyun Zhang<sup>1</sup>,  
6           Chen Chen<sup>2,3</sup>, Liyuan Han<sup>4,5</sup>, Yongli Yang<sup>6</sup>, Wei Wang<sup>7</sup>, Yawei Zhang<sup>8</sup>, Zuyun Liu<sup>1\*</sup>

7  
8  
9  
10           <sup>1</sup>Department of Big Data in Health Science School of Public Health and Center for  
11           Clinical Big Data and Analytics of the Second Affiliated Hospital, Zhejiang  
12           University School of Medicine, Hangzhou 310058, Zhejiang, China

13  
14           <sup>2</sup>National Institute of Environmental and Health, Chinese Center for Disease Control  
15           and Prevention, Beijing, 100021, China

16  
17           <sup>3</sup>National Center for AIDS/STD Control and Prevention, Chinese Center for Disease  
18           Control and Prevention, Beijing, 102206, China

19  
20           <sup>4</sup>Department of Global Health, Ningbo Institute of Life and Health Industry,  
21           University of Chinese Academy of Sciences, Ningbo, 315200, Zhejiang, China

22  
23           <sup>5</sup>Hwa Mei Hospital, University of Chinese Academy of Sciences, Ningbo, 315200,  
24           Zhejiang, China

25  
26           <sup>6</sup>Department of Epidemiology and Biostatistics, College of Public Health, Zhengzhou  
27           University, Zhengzhou 450001, Henan, China

28  
29           <sup>7</sup>Department of Occupational Health and Occupational disease, College of Public  
30           Health, Zhengzhou University, Zhengzhou450001, Henan, China

31  
32           <sup>8</sup>National Cancer Center/National Clinical Research Center for Cancer/Cancer  
33           Hospital, Chinese Academy of Medical Sciences and Peking Union Medical College,  
34           Beijing, 100021, China

35  
36  
37           #These authors contributed equally to this work.

38  
39  
40  
41           \***Corresponding author:** Zuyun Liu, Professor, Department of Big Data in Health  
42           Science School of Public Health and Center for Clinical Big Data and Analytics of the  
43           Second Affiliated Hospital, Zhejiang University School of Medicine, 866 Yuhangtang  
44           Rd, Hangzhou, 310058, Zhejiang, China. Telephone: +86-0571-87077127.  
45           Email: Zuyun.liu@outlook.com or zuyunliu@zju.edu.cn

47 **Abstract**

48 **Objectives:** It remains unknown whether healthy lifestyle attenuates the detrimental  
49 effects of urinary monohydroxy polycyclic aromatic hydrocarbons (OH-PAHs) on  
50 aging. This study aims: 1) to examine the associations of OH-PAHs and lifestyle with  
51 Phenotypic Age Acceleration (PhenoAge.Accel), a novel aging measure, respectively;  
52 and 2) to evaluate the potential interaction effects of OH-PAHs and lifestyle on  
53 PhenoAge.Accel.

54 **Methods:** Cross-sectional data of 2579 participants (aged 20-84 years, n=1292  
55 females) from the National Health and Nutrition Examination Survey for years 2001-  
56 2010 were analyzed. A lifestyle index was constructed based on five components  
57 (drinking, smoking, body mass index, physical activity, and diet), ranging from 0 to 5.  
58 We calculated PhenoAge.Accel using algorithms developed previously. General  
59 linear regression models were used to examine the associations.

60 **Results:** We observed strong associations of OH-PAHs and lifestyle with  
61 PhenoAge.Accel. For instance, one unit increase in  $\sum$ NAP (sum of 1- and 2-  
62 hydroxynaphthalene) was associated with 0.37 year (95% confidence interval [CI]:  
63 0.26, 0.48) increase in PhenoAge.Accel. We did not observe statistically significant  
64 interaction effects between OH-PAHs and lifestyle on PhenoAge.Accel. After  
65 stratified by sex, we observed strong associations as well as statistically significant  
66 interactions of OH-PAHs and lifestyle with PhenoAge.Accel among females.

67 **Conclusions:** Both OH-PAHs and lifestyle were independently associated with  
68 phenotypic aging and there were statistically significant interactions between OH-  
69 PAHs and lifestyle on phenotypic aging among females. The findings highlight the  
70 importance of adherence to a healthy lifestyle to attenuate the detrimental effects of  
71 exposures to PAHs on phenotypic aging among females.

72

73

74 **Keywords:** Polycyclic aromatic hydrocarbon; aging; Phenotypic Age; lifestyle;

75 National Health and Nutrition Examination Survey

76

**Abbreviations:** OH-PAHs, monohydroxy polycyclic aromatic hydrocarbons; PhenoAge.Accel, Phenotypic Age Acceleration; CI, confidence interval;  $\sum$ NAP, Naphthalene, sum of 1- and 2-hydroxynaphthalene;  $\sum$ FLU, Fluorene, sum of 2- and 3-hydroxyfluorene;  $\sum$ PHE, Phenanthrene, sum of 1-, 2-, and 3-hydroxyphenanthrene;  $\sum$ PYR, Pyrene, 1-hydroxypyrene;  $\sum$ OH-PAHs, sum of 1-, 2-hydroxynaphthalene, 2-, 3-hydroxyfluorene, 1-, 2-, 3-hydroxyphenanthrene and 1-hydroxypyrene; BMI, body mass index; HANES, National Health and Nutritional Examination Surveys; MEC, Mobile Exam Center; CDC, Centers for Disease Control and Prevention; PIR, poverty income ratio; Cr, creatinine; SD, standard deviation; LOD, limit of detection; MET, metabolic equivalent; HEI, Healthy Eating Index; CA, chronological age; HS, high school; GED, general educational development.

## 77 1. Introduction

78 Polycyclic aromatic hydrocarbons (PAHs) are pivotal components of air  
79 pollutants, as they are produced by incomplete combustion of organic materials such  
80 as tobacco, fossil fuels, and even through cooking (Kim et al. 2013). Multiple  
81 potential pathways (e.g., dermal absorption (McClean et al. 2004), ingestion (Veyrand  
82 et al. 2013), inhalation (Zhang et al. 2014)) have led to widespread general population  
83 exposure to PAHs. PAHs are metabolized through the liver and excreted in urine and  
84 feces with an average half-life of < 30h in the human body (Buckley and Lioy 1992;  
85 Motorykin et al. 2015). Because of the short half-life of PAHs, many metabolites in  
86 urinary samples have been identified as proper biomarkers of recent exposure to  
87 PAHs (Grainger et al. 2006). Existing evidence has shown that exposure to PAHs  
88 increases risk of many chronic diseases, including cardiovascular disease (Burstyn et  
89 al. 2005), diabetes (Stallings-Smith et al. 2018; Wang et al. 2019), and respiratory  
90 illness (Abdel-Shafy and Mansour 2016).

91 Aging is a critical risk factor for many chronic diseases (Kennedy et al. 2014).  
92 As a complex process, aging represents changes in body composition, homeostatic  
93 mechanisms, energetics, and brain health over time (Ferrucci et al. 2018), which could  
94 be reflected by multisystem clinical chemistry biomarkers. We have recently  
95 developed a novel aging measure, Phenotypic Age Acceleration (PhenoAge.Accel),  
96 derived from nine chemistry biomarkers (Levine et al. 2018; Liu et al. 2018).  
97 PhenoAge.Accel has been demonstrated to capture morbidity and mortality risk  
98 across diverse subpopulations in the US (Liu et al. 2018). Given the close connection  
99 between aging and chronic diseases, it is intuitive to speculate that PAHs increase the  
100 risk of chronic diseases partially through accelerating the phenotypic aging process,  
101 which is in line with the Geroscience paradigm (Kennedy et al. 2014).

102 Of note, aging is strongly responsive to many other risk factors, e.g., modifiable  
103 lifestyle factors. We have shown that a healthy lifestyle index consisting of non-  
104 drinking, a healthy diet, doing exercise, non-smoking and healthy body mass index  
105 (BMI) was significantly associated with an aging measure derived from chemistry  
106 biomarkers in Chinese oldest-old population (Jin et al. 2021). Together with other  
107 studies (Astuti et al. 2017; Robinson et al. 2020), we highlight the importance of  
108 adherence to a healthy lifestyle to slow aging in daily life. Hence, it is intriguing to  
109 examine the role of lifestyle in the potential associations between PAHs and  
110 phenotypic aging. We hypothesize that there would be an interaction effect of PAHs  
111 and lifestyle on phenotypic aging. In other words, the strength of the detrimental  
112 effects of PAHs on phenotypic aging would be attenuated in persons with a healthy  
113 lifestyle.

114 Therefore, we analyzed data from the National Health and Nutritional  
115 Examination Surveys in 2001-2010 (NHANES 2001-2010) to examine the  
116 associations of PAHs and lifestyle with PhenoAge.Accel, a novel aging measure; and  
117 to evaluate the potential interaction effects of PAHs and lifestyle on PhenoAge.Accel.  
118

119

## 120 **2. Materials and Methods**

### 121 *2.1. Study Population*

122 Briefly, NHANES is a program designed to assess the health and nutritional  
123 status of civilian in the US, using a complex, multistage sampling procedure. Through  
124 examinations in a Mobile Exam Center (MEC) and at-home interviews, NHANES  
125 collected a large amount of information (e.g., demographics, socioeconomic status,  
126 dietary, and health-related questions, and medical and physiological measurements)  
127 from a nationally representative sample biennially in counties across the country.  
128 Details of the procedures, study design and recruitment for NHANES are provided by  
129 the Centers for Disease Control and Prevention (CDC) (NHANES website:  
130 <https://www.cdc.gov/nchs/nhanes/index.htm>). The protocol of NHANES was  
131 approved by the National Center for Health Statistics Research Board.

132 Five waves of NHANES (2001-2002, 2003-2004, 2005-2006, 2007-2008, 2009-  
133 2010, with information on both PAHs and PhenoAge) were combined and used in this  
134 study (N = 52195). Participants with missing data on blood biomarkers for calculating  
135 PhenoAge (who did not provide blood samples, N=42488), on education level (N =  
136 11), poverty income ratio (PIR, N = 666), and urinary creatinine (Cr, N = 70) or did  
137 not provide urine samples for testing urinary PAHs (N = 6250) were excluded. For  
138 each PAH, we excluded the outliers whose values (after correction by creatinine)  
139 were higher than mean + 3 standard deviation (SD) or lower than mean - 3 SD. The  
140 final analytic sample included 2579 participants aged 20-84 years (Figure S1).

141

### 142 *2.2. Measurements of OH-PAHs and creatinine in urine*

143 Our analyses included eight urinary monohydroxy polycyclic aromatic  
144 hydrocarbons (OH-PAHs) and created five summarized urinary PAH measurements  
145 through grouping them by parent PAH (Grainger et al. 2006): Naphthalene (1- and 2-  
146 hydroxynaphthalene,  $\Sigma$ NAP); Fluorene (2- and 3-hydroxyfluorene,  $\Sigma$ FLU);  
147 Phenanthrene (1-, 2-, and 3-hydroxyphenanthrene,  $\Sigma$ PHE); Pyrene (1-hydroxypyrene,  
148  $\Sigma$ PYR) and  $\Sigma$ OH-PAH (sum of eight OH-PAHs). Details of sample collection and  
149 measurements were described elsewhere (NHANES website). In brief, participants'  
150 spot urinary specimen was collected at MEC, stored at -20°C and then transferred to  
151 CDC laboratory for analysis. After enzymatic hydrolysis and solid-phase extraction,  
152 OH-PAHs were analyzed through isolate dilution capillary gas chromatography  
153 combined with mass spectrometry. The percentage of OH-PAHs above the analytical  
154 limit of detection (LOD) was > 98% in NHANES 2001-2010 waves. Considering the  
155 majority of the LODs for OH-PAHs vary across NHANES waves, we utilized the  
156 method provided by the CDC and assigned the maximal LOD divided by the square  
157 root of two to any PAH below the corresponding LOD in each wave. The LOD of

158 each PAH is published in the Laboratory Procedure Manual for each NHANES wave  
159 (Brockmeyer et al. 2018; Fan et al. 2021).

160 Urinary creatinine was measured by clinical analyzer and the LOD remained  
161 constant at 1 mg/mL (NHANES website). For urinary creatinine below the LOD, we  
162 applied 1 mg/mL to the maximal LOD divided by the square root of two. In all  
163 analyses, we used urinary creatinine to adjust for urinary dilution (Li et al. 2021). The  
164 distributions of the urinary concentrations of OH-PAHs were skewed; and thus, each  
165 PAH used in our analysis was transformed by urinary creatinine and log conversion.

166

### 167 *2.3. Lifestyle index*

168 As done in previous studies (Jin et al. 2021; Li et al. 2018b; Li et al. 2020), a  
169 lifestyle index was calculated by combining five components: drinking, smoking,  
170 BMI, physical activity, and diet. Each component was assigned a point of 0 or 1; and  
171 thus, the lifestyle index ranged from 0 to 5, with higher points indicating a healthier  
172 lifestyle. Lifestyle was classified as three categories according to the index: unhealthy  
173 (lifestyle index = 0 or 1), middle (lifestyle index = 2 or 3) and healthy (lifestyle index  
174 = 4 or 5) in analysis.

175 The five components were collected by structured questionnaires or physical  
176 examination. For drinking, frequency and volume of current alcohol consumption  
177 were self-reported. According to the dietary guidelines in the US, we assigned a point  
178 of 1 to males who consumed alcohol two drinks or fewer every day and females who  
179 consumed alcohol one drink or fewer every day (Zhang et al. 2021); otherwise, we  
180 assigned a point of 0. For smoking, we assigned a point of 1 to participants who  
181 reported that they smoked less than 100 cigarettes in a lifetime (non-smoking);  
182 otherwise, we assigned a point of 0. BMI was calculated as weight in kilograms  
183 divided by height in meters squared. We assigned point of 1 to participants whose  
184 BMI was higher than 18.5 kg/m<sup>2</sup> and lower than 25.0 kg/m<sup>2</sup>. For physical activity, we  
185 assigned a point of 1 to participants whose metabolic equivalent (MET) score was in  
186 the top tercile (Zhang et al. 2021). For diet, an in-person 24-hour dietary recall at the  
187 MEC and a follow-up 24-hour dietary recall by phone 3 to 10 days later were  
188 conducted by the NHANES interviewer. Dietary quality was assessed using the  
189 Healthy Eating Index-2010 (HEI-2010), a validated measurement for how well diets  
190 abide by the 2010 Dietary Guidelines for Americans (Bowman SA ; Kirkpatrick et al.  
191 2018). HEI-2010 ranges from 0 to 100, with higher values indicating healthier diets  
192 that more closely align with the 2010 Dietary Guidelines for Americans  
193 (Kinderknecht et al. 2020). Participants whose HEI-2010 falling into the top two fifths  
194 of distribution were assigned a point of 1; otherwise, they were assigned a point of 0  
195 (Li et al. 2018b; Li et al. 2020).

196

### 197 *2.4. Phenotypic Age Acceleration (PhenoAge.Accel)*

198 We developed PhenoAge based on data from NHANES III (Levine et al. 2018;  
199 Liu et al. 2018). PhenoAge was calculated from chronological age (CA) and nine  
200 biomarkers (i.e., creatinine, albumin, [log] C-reactive protein, glucose, alkaline  
201 phosphatase, lymphocyte percent, red cell distribution width, mean cell volume, and  
202 white blood cell count) which had been selected through a Cox Proportional Hazards  
203 Elastic Net model for mortality based on ten-fold cross-validation. PhenoAge (unit in  
204 years) represents person's expected age within the population, which is consistent  
205 with a person's estimated hazard of mortality as a function of his/her chemistry  
206 biomarkers profile (Levine et al. 2018; Liu et al. 2018). The equation to calculate  
207 PhenoAge is shown below:

$$\text{PhenoAge} = 141.50 + \frac{\ln \{-0.00553 \times \ln(1 - \text{mortality risk})\}}{0.090165}$$

208 where

$$\text{Mortality risk} = 1 - \exp\left(\frac{-1.51714 \times \exp(xb)}{0.0076927}\right)$$

209 and

$$\begin{aligned} xb = & -19.907 - 0.0336 \times \text{albumin} + 0.0095 \times \text{creatinine} + 0.1953 \times \text{glucose} \\ & + 0.0954 \times \ln(\text{C-reactive protein}) - 0.0120 \\ & \times \text{lymphocyte percentage} + 0.0268 \times \text{mean cell volume} + 0.3306 \\ & \times \text{red blood cell distribution width} + 0.00188 \\ & \times \text{alkaline phosphatase} + 0.0554 \times \text{white blood cell count} \\ & + 0.0804 \times \text{chronological age} \end{aligned}$$

210 As mentioned above, we calculated a novel aging measure, PhenoAge  
211 Acceleration (PhenoAge.Accel), defined as residual from a linear model when  
212 regressing PhenoAge on CA. PhenoAge.Accel represents phenotypic aging after  
213 accounting for the effect of CA, i.e., a person is phenotypically older (younger) if  
214 his/her PhenoAge.Accel > 0 (< 0) than expected based on his/her CA (Levine et al.  
215 2018; Liu et al. 2018).

216

## 217 2.5. Covariates

218 Obtained through structured questionnaires, our covariates included CA, sex  
219 (male and female), race/ethnicity (non-Hispanic White, non-Hispanic Black, Mexican  
220 American, and others), education level (less than high school (HS), HS/general  
221 educational development (GED), above HS Grad), PIR (< 1, 1-3, ≥ 3) (You et al.  
222 2021).

223

## 224 2.6. Statistical analyses

225 We presented basic characteristics of the participants in total and by sex, using  
226 mean ± SD for continuous variables and numbers (percentage) for categorical  
227 variables. The correlation between each PAH was analyzed using scatter plot and  
228 Pearson's coefficient matrix.



229 We used general linear regression models to examine the associations of OH-  
230 PAHs and lifestyle with PhenoAge.Accel, respectively. To account for the complex  
231 sampling procedure, we considered PAH weight (provided by NHANES) in analyses.  
232 We considered two models. In Model 1, we adjusted for CA and sex. In Model 2, we  
233 additionally adjusted for race/ethnicity, education level, and PIR. To examine the  
234 interaction effect of OH-PAHs (two categories: high and low using median as the  
235 cutoff) and lifestyle category (unhealthy, middle, and healthy) on phenotypic aging,  
236 we added cross-product terms and tested the statistical significance in Model 1 and 2.  
237 To better explicitly illustrate the possible interaction effects, we first examined the  
238 associations between OH-PAHs and PhenoAge.Accel, stratified by lifestyle category,  
239 and this could suggest the potential modifying effect of lifestyle. Second, we  
240 constructed six subgroups by OH-PAHs (two categories) and lifestyle category, and  
241 re-examined the associations between OH-PAHs and PhenoAge.Accel, using the  
242 group with “unhealthy lifestyle” and “high” OH-PAHs as the reference. We  
243 documented the coefficient and corresponding 95% confidence interval (CI).

244 Given the established sex differences in health effect of ambient air pollution  
245 (Shin et al. 2022), we repeated the analyses above stratified by sex. Moreover, to test  
246 the robustness of our findings, we performed a sensitivity analysis by replacing the  
247 PAH weight with the blood weight (provided by NHANES) and repeated analyses.

248 All analyses were performed using SAS version 9.4 (SAS Institute, Cary, NC)  
249 and R version 4.1.1. Statistically significance was defined as a two-tailed P value <  
250 0.05.

251

252

### 253 **3. Results**

#### 254 *3.1. Basic characteristics of study participants*

255 Table 1 shows the basic characteristics of the participants. The mean CA ( $\pm$  SD)  
256 of study participants was  $48.2 \pm 17.6$  years. A total of 1292 participants were female.  
257 In all participants, the mean values of  $\sum$ NAP,  $\sum$ FLU,  $\sum$ PHE,  $\sum$ PYR, and  $\sum$ OH-PAH  
258 were  $6.5 \pm 2.0$ ,  $0.9 \pm 2.0$ ,  $-0.6 \pm 1.9$ ,  $-0.3 \pm 0.9$ , and  $6.5 \pm 5.8$  (ng/g Cr), respectively.  
259 As shown in Figure S2, a strong correlation between each two of PAHs was revealed.  
260 The mean value of PhenoAge ( $\pm$  SD) was  $42.5 \pm 19.6$  years; and PhenoAge.Accel  
261 roughly exhibits a normal distribution (Fig. 1).

262

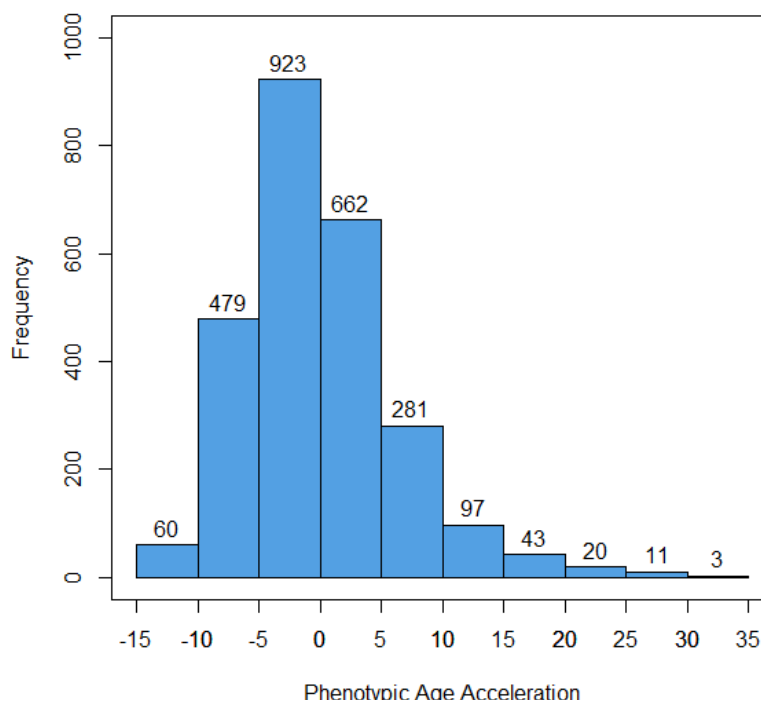

263

264

**Fig. 1.** Distribution of participants' Phenotypic Age Acceleration in this study.

265

### 266 3.2. Associations of OH-PAHs and lifestyle with PhenoAge.Accel

267

268 In Table 2, after adjustment for CA and sex (Model 1), we observed that all OH-  
269 PAHs were significantly associated with PhenoAge.Accel (all  $P < 0.05$ ). For instance,  
270 one unit increase in  $\sum$ NAP was associated with 0.37 year (95% CI: 0.26, 0.48)  
271 increase in PhenoAge.Accel and one unit increase in  $\sum$ OH-PAH was associated with  
272 0.13 year (95% CI: 0.10, 0.17) increase in PhenoAge.Accel. After further adjusting  
273 for race/ethnicity, education level, and PIR in Model 2, the statistically significant  
274 associations of OH-PAHs with PhenoAge.Accel were maintained.

274

275 As shown in Table 2, compared to participants with an unhealthy lifestyle, those  
276 who with a middle lifestyle ( $\beta = -1.89$ , 95% CI: -2.48, -1.30) and a healthy lifestyle ( $\beta$   
277 = -4.24, 95% CI: -5.00, -3.48) had lower level of PhenoAge.Accel. Similar results  
278 were observed in Model 2.

278

### 279 3.3. The interaction effects of OH-PAHs and lifestyle on PhenoAge.Accel

280

281 We did not observe statistically significant interactions of OH-PAHs and  
282 lifestyle on PhenoAge.Accel (data not shown). However, our results suggested that  
283 lifestyle might attenuate the effects of OH-PAHs on PhenoAge.Accel. As shown in  
284 Figure 2, the association between  $\sum$ OH-PAH and PhenoAge.Accel was statistically  
285 significant ( $\beta = 0.10$ ,  $P = 0.026$ ) among participants with an unhealthy lifestyle, but  
286 the association was non-significant ( $\beta = -0.01$ ,  $P = 0.917$ ) for participants with a  
287 healthy lifestyle.



287 Among six subgroups constructed by OH-PAHs (by median, two categories) and  
288 lifestyle (three categories), we observed that subgroups with a healthy lifestyle had  
289 the lowest level of PhenoAge.Accel regardless of a high or low PAH (Figure S3).  
290

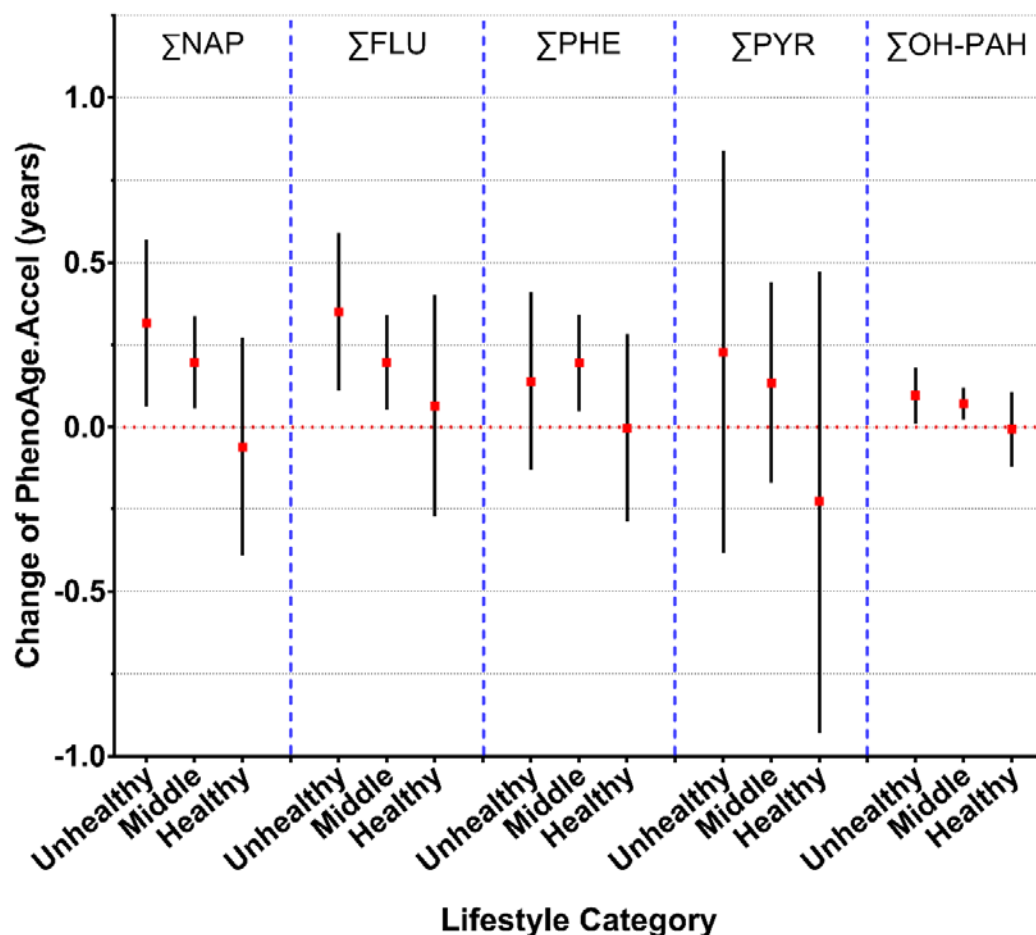

291

292 **Fig. 1.** Associations of urinary OH-PAHs with PhenoAge.Accel by lifestyle category.  
293 Abbreviations: OH-PAHs, monohydroxy polycyclic aromatic hydrocarbons; ΣNAP,  
294 sum of 1-NAP and 2-NAP; ΣFLU, sum of 2-FLU and 3-FLU; ΣPHE, sum of 1-PHE,  
295 2-PHE, and 3-PHE; ΣPYR, 1-PYR; ΣOH-PAH, sum of 1-NAP, 2-NAP, 2-FLU, 3-  
296 FLU, 1-PHE, 2-PHE, 3-PHE and 1-PYR; PhenoAge.Accel, Phenotypic Age  
297 acceleration.

298 Results were from a model adjusted for chronological age, sex, race/ethnicity,  
299 education level, and poverty income ratio.

300

### 301 3.4. Additional analysis

302 Table S1 shows the significant associations of OH-PAHs and lifestyle with  
303 PhenoAge.Accel in males and females. For instance, one unit increase in ΣNAP was  
304 associated with 0.44 year (95% CI: 0.28, 0.60) increase in PhenoAge.Accel among  
305 males and 0.32 year (95% CI: 0.16, 0.31) increase in PhenoAge.Accel among  
306 females. Interestingly, we observed statistically significant interactions between several OH-

307 PAHs and lifestyle (e.g., P for interaction = 0.029 for  $\sum$ NAP \* lifestyle category) on  
308 PhenoAge.Accel among females (Table S2). As shown in Figure 3, stratified by  
309 lifestyle, for females with an unhealthy lifestyle, we observed a significant association  
310 between OH-PAHs and PhenoAge while we did not observe similar associations for  
311 females with a middle or healthy lifestyle. In sensitivity analyses, we replaced the  
312 PAH weight with the blood weight and found that the results were maintained when:  
313 (1) re-examining the associations of urinary OH-PAHs and lifestyle with  
314 PhenoAge.Accel (Table S3); (2) re-examining the associations of urinary OH-PAHs  
315 and lifestyle with PhenoAge.Accel stratified by sex (Table S4); (3) re-examining the  
316 interaction between OH-PAHs and lifestyle stratified by sex (Table S5); (4) re-  
317 examining the associations of urinary OH-PAHs with PhenoAge.Accel by lifestyle  
318 category (Figure S4); (5) re-examining the associations of urinary OH-PAHs with  
319 PhenoAge.Accel by sex and lifestyle category (Figure S5); and (6) re-examining the  
320 joint associations of OH-PAHs and lifestyle with PhenoAge.Accel (Figure S6).  
321

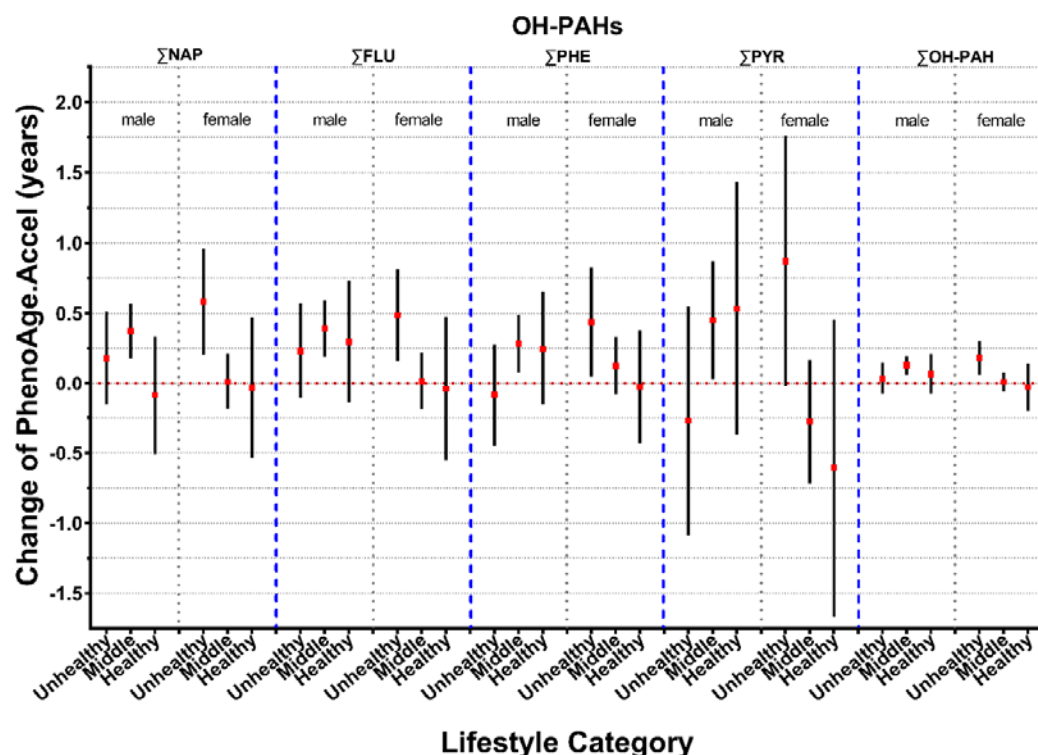

322

323 **Fig. 2.** Associations of OH-PAHs with PhenoAge.Accel by sex and lifestyle category.  
324 Abbreviations: OH-PAHs, monohydroxy polycyclic aromatic hydrocarbons;  $\sum$ NAP,  
325 sum of 1-NAP and 2-NAP;  $\sum$ FLU, sum of 2-FLU and 3-FLU;  $\sum$ PHE, sum of 1-PHE,  
326 2-PHE, and 3-PHE;  $\sum$ PYR, 1-PYR;  $\sum$ OH-PAH, sum of 1-NAP, 2-NAP, 2-FLU, 3-  
327 FLU, 1-PHE, 2-PHE, 3-PHE and 1-PYR; PhenoAge.Accel, Phenotypic Age  
328 Acceleration.

329 Results were from a model adjusted for chronological age, sex, race/ethnicity,  
330 education level, and poverty income ratio.

#### 331 4. Discussion

332 Based on the data from NHANES 2001-2010, we found that OH-PAHs and  
333 lifestyle were independently associated with PhenoAge.Accel. We also found  
334 interaction effects of several OH-PAHs and lifestyle on PhenoAge.Accel among  
335 females. Since accelerated aging indicates adverse health issues in later life, our  
336 findings highlight the importance of adherence to a healthy lifestyle, particularly for  
337 females who are exposed to high PAHs.

338 For the first time, we demonstrated that high PAHs were associated with  
339 accelerated phenotypic aging. Qiao et al (Qiao et al. 2017) revealed the adverse effect  
340 of PAHs on skin aging. Pavanello et al (Pavanello et al. 2020) suggested that certain  
341 preventable everyday life exposures to PAHs reduce leucocyte telomere length and  
342 mitochondrial DNA copy number, which were associated with increased risks of  
343 mortality and age-related diseases. Studies have reported that exposure to PAHs was  
344 associated with accelerations of DNA methylation age (Li et al. 2018a). Though our  
345 findings complement these results to some extent, PhenoAge.Accel represents a  
346 multisystem aging process, with complex underlying biological mechanisms. Our  
347 findings may provide an exciting new avenue for investigating the underlying  
348 biological mechanisms of how air pollutions induce aging-related adverse health  
349 outcomes (including age-related diseases and mortality) through aging.

350 The detrimental effects of exposures to PAHs on phenotypic aging were  
351 attenuated by a healthy lifestyle in females, which has not been reported previously.  
352 Although some results did not reach the statistical significance, the trend was  
353 observed when examining the association of PAHs with phenotypic aging stratified  
354 by sex (Fig. 2). For example, detrimental effects of PAHs on phenotypic aging in a  
355 subgroup with an unhealthy lifestyle were not observed in a subgroup with a healthy  
356 lifestyle. The findings have important public implications, suggesting adaption to a  
357 healthy lifestyle to attenuate the detrimental effect of exposure to air pollutions (e.g.,  
358 PAHs) on phenotypic aging among females. However, chance findings cannot be rule  
359 out when interpreting the results given the relatively small sample size of the stratified  
360 analyses by sex.

361 One plausible underlying biological mechanism of the interesting interaction  
362 effect of PAHs and lifestyle on phenotypic aging is related to oxidative stress and  
363 inflammation. Higher exposure to PAHs could result in increased oxidative stress  
364 (Zhu et al. 2021) and oxidative DNA damage (Kuang et al. 2013), two key  
365 determinants of aging process. PAHs can induce inflammatory response in the body  
366 including elevating high C-reactive protein levels (a marker reflecting the systemic  
367 inflammation and was included in calculation of PhenoAge) (Farzan et al. 2016).  
368 Interestingly, many components included in our lifestyle index have been  
369 demonstrated to be associated with inflammation or oxidative stress as well, such as  
370 diet quality (de Castro Mendes et al. 2020), physical activity (Tu et al. 2020) and BMI.  
371 For instance, adipose tissue can produce proinflammatory cytokines (TNF- $\alpha$ , IL-1 $\beta$   
372 and IL-6) related to persistent inflammation and oxidative stress, and adipokines

373 (leptin, adiponectin, plasminogen activator inhibitor, and macrophage migration  
374 inhibitory factor) which mediate the inflammatory response (Fain 2006). Building on  
375 the above evidence, we speculate that high PAHs were associated with accelerated  
376 phenotypic aging, partially through increased oxidative stress and inflammation.

377 There are several strengths in this study. First, NHANES employs thorough  
378 quality control and quality assurance procedures to ensure the validity of the data.  
379 Second, we concentrated on a lifestyle index rather than a single component, to  
380 comprehensively capture the complex relations of many lifestyle factors. Third, the  
381 study outcome, PhenoAge.Accel, is not simply a measure of mortality; instead, it may  
382 be a marker that could track the aging process before diseases become clinically  
383 evident. Thus, the findings have more public health implications in terms of disease  
384 preventions in community settings.

385 However, this study has some limitations. First, information on several lifestyle  
386 components was self-reported; and thus, recall bias is possible. Second, the level of  
387 PAHs in spot urine was performed by a single measurement; and thus, intra-person  
388 variability and long-term average exposure may not be reflected. Third, the temporal  
389 relationships between PAHs, lifestyle and phenotypic aging cannot be determined  
390 given the cross-sectional study design. Fourth, the analytic sample was selected based  
391 on multiple criteria such as with information on both PAHs and PhenoAge; and thus,  
392 was relatively small (for stratification analysis) and might be biased to some extent.  
393 Finally, although we included many covariates, there may still be residual and  
394 unmeasured confounders.

395  
396

## 397 **5. Conclusions**

398 In this sample of an US population, for the first time, we demonstrated that both  
399 OH-PAHs and lifestyle were independently associated with phenotypic aging and  
400 there were statistically significant interactions between OH-PAHs and lifestyle on  
401 phenotypic aging among females. The findings provide important insights into the  
402 underlying biological mechanism of how exposure to PAHs and lifestyle accelerate  
403 aging. Furthermore, the findings highlight the importance of adherence to a healthy  
404 lifestyle to attenuate accelerated phenotypic aging, which has significant public health  
405 implications.

406

407 **Acknowledgments**

408 This study was supported by a grant from the National Natural Science Foundation of  
409 China (82171584), the 2020 Milstein Medical Asian American Partnership  
410 Foundation Irma and Paul Milstein Program for Senior Health project award (ZL), the  
411 Fundamental Research Funds for the Central Universities (ZL), a project from the  
412 Natural Science Foundation of Zhejiang Province (LQ21H260003), and Zhejiang  
413 University Global Partnership Fund (188170-11103). The funders had no role in the  
414 study design; data collection, analysis, or interpretation; in the writing of the report; or  
415 in the decision to submit the article for publication.

416

417

418 **Declaration of Competing Interest**

419 The authors declare that they have no known competing financial interests or personal  
420 relationships that could have appeared to influence the work reported in this paper.

421

422

423

424 **Reference**

425 SAS code. Division of Cancer Control and Population Science website.

426 <https://epi.grants.cancer.gov/hei/sas-code.html> (accessed

427 Abdel-Shafy, H.I.; Mansour, M.S.M. A review on polycyclic aromatic hydrocarbons: Source,

428 environmental impact, effect on human health and remediation. Egyptian Journal of

429 Petroleum 2016;25:107-123. <https://doi.org/https://doi.org/10.1016/j.ejpe.2015.03.011>

430 Astuti, Y.; Wardhana, A.; Watkins, J.; Wulaningsih, W. Cigarette smoking and telomere length:

431 A systematic review of 84 studies and meta-analysis. Environ Res 2017;158:480-489.

432 <https://doi.org/10.1016/j.envres.2017.06.038>

433 Bowman SA, C.J., Friday JE, Thoerig RC, Moshfegh AJ. Food Patterns Equivalents Database

434 2005-06: Methodology and User Guide. 2014.

435 [https://www.ars.usda.gov/ARSUserFiles/80400530/pdf/fped/FPED\\_0506.pdf](https://www.ars.usda.gov/ARSUserFiles/80400530/pdf/fped/FPED_0506.pdf)

436 (accessed

437 Brockmeyer, T.; Friederich, H.C.; Schmidt, U. Advances in the treatment of anorexia nervosa:

438 a review of established and emerging interventions. Psychol Med 2018;48:1228-1256.

439 <https://doi.org/10.1017/S0033291717002604>

440 Buckley, T.J.; Lioy, P.J. An examination of the time course from human dietary exposure to

441 polycyclic aromatic hydrocarbons to urinary elimination of 1-hydroxypyrene. British

442 Journal of Industrial Medicine 1992;49:113. <https://doi.org/10.1136/oem.49.2.113>

443 Burstyn, I.; Kromhout, H.; Partanen, T.; Svane, O.; Langård, S.; Ahrens, W.; Kauppinen, T.;

444 Stücker, I.; Shaham, J.; Heederik, D.; Ferro, G.; Heikkilä, P.; Hooiveld, M.; Johansen,

445 C.; Randem, B.G.; Boffetta, P. Polycyclic aromatic hydrocarbons and fatal ischemic



- 446 heart disease. *Epidemiology* 2005;16:744-750.
- 447 <https://doi.org/10.1097/01.ede.0000181310.65043.2f>
- 448 de Castro Mendes, F.; Paciência, I.; Cavaleiro Rufo, J.; Silva, D.; Cunha, P.; Farraia, M.;
- 449 Delgado, L.; Garcia-Larsen, V.; Severo, M.; Moreira, A.; Moreira, P. The inflammatory
- 450 potential of diet impacts the association between air pollution and childhood asthma.
- 451 *Pediatric Allergy and Immunology* 2020;31:290-296.
- 452 <https://doi.org/https://doi.org/10.1111/pai.13185>
- 453 Fain, J.N. Release of interleukins and other inflammatory cytokines by human adipose tissue
- 454 is enhanced in obesity and primarily due to the nonfat cells. *Vitam Horm*
- 455 2006;74:443-477. [https://doi.org/10.1016/s0083-6729\(06\)74018-3](https://doi.org/10.1016/s0083-6729(06)74018-3)
- 456 Fan, J.; Cai, S.; Mi, S.; Chen, H.; Chen, D.; Fan, C.; Sun, L.; Li, Y. Association of urinary
- 457 phthalate metabolites with osteoarthritis in American adults: Results from the national
- 458 health and nutrition examination survey 2003–2014. *Chemosphere* 2021;268:128807.
- 459 <https://doi.org/https://doi.org/10.1016/j.chemosphere.2020.128807>
- 460 Farzan, S.F.; Chen, Y.; Trachtman, H.; Trasande, L. Urinary polycyclic aromatic hydrocarbons
- 461 and measures of oxidative stress, inflammation and renal function in adolescents:
- 462 NHANES 2003–2008. *Environmental Research* 2016;144:149-157.
- 463 <https://doi.org/https://doi.org/10.1016/j.envres.2015.11.012>
- 464 Ferrucci, L.; Levine, M.E.; Kuo, P.L.; Simonsick, E.M. Time and the Metrics of Aging. *Circ Res*
- 465 2018;123:740-744. <https://doi.org/10.1161/circresaha.118.312816>

- 466 Grainger, J.; Huang, W.; Patterson, D.G.; Turner, W.E.; Pirkle, J.; Caudill, S.P.; Wang, R.Y.;
- 467 Needham, L.L.; Sampson, E.J. Reference range levels of polycyclic aromatic
- 468 hydrocarbons in the US population by measurement of urinary monohydroxy
- 469 metabolites. *Environmental Research* 2006;100:394-423.
- 470 <https://doi.org/https://doi.org/10.1016/j.envres.2005.06.004>
- 471 Jin, S.; Li, C.; Cao, X.; Chen, C.; Ye, Z.; Liu, Z. Association of lifestyle with mortality and the
- 472 mediating role of aging among older adults in China. *Arch Gerontol Geriatr*
- 473 2021;98:104559. <https://doi.org/10.1016/j.archger.2021.104559>
- 474 Kennedy, B.K.; Berger, S.L.; Brunet, A.; Campisi, J.; Cuervo, A.M.; Epel, E.S.; Franceschi, C.;
- 475 Lithgow, G.J.; Morimoto, R.I.; Pessin, J.E.; Rando, T.A.; Richardson, A.; Schadt, E.E.;
- 476 Wyss-Coray, T.; Sierra, F. Geroscience: Linking Aging to Chronic Disease. *Cell*
- 477 2014;159:709-713. <https://doi.org/https://doi.org/10.1016/j.cell.2014.10.039>
- 478 Kim, K.-H.; Jahan, S.A.; Kabir, E.; Brown, R.J.C. A review of airborne polycyclic aromatic
- 479 hydrocarbons (PAHs) and their human health effects. *Environment International*
- 480 2013;60:71-80. <https://doi.org/https://doi.org/10.1016/j.envint.2013.07.019>
- 481 Kinderknecht, K.; Harris, C.; Jones-Smith, J. Association of the Healthy, Hunger-Free Kids
- 482 Act With Dietary Quality Among Children in the US National School Lunch Program.
- 483 *JAMA* 2020;324:359-368. <https://doi.org/10.1001/jama.2020.9517>
- 484 Kirkpatrick, S.I.; Reedy, J.; Krebs-Smith, S.M.; Pannucci, T.E.; Subar, A.F.; Wilson, M.M.;
- 485 Lerman, J.L.; Toozé, J.A. Applications of the Healthy Eating Index for Surveillance,
- 486 Epidemiology, and Intervention Research: Considerations and Caveats. *Journal of*

487 the Academy of Nutrition and Dietetics 2018;118:1603-1621.

488 <https://doi.org/https://doi.org/10.1016/j.jand.2018.05.020>

489 Kuang, D.; Zhang, W.; Deng, Q.; Zhang, X.; Huang, K.; Guan, L.; Hu, D.; Wu, T.; Guo, H.

490 Dose-Response Relationships of Polycyclic Aromatic Hydrocarbons Exposure and

491 Oxidative Damage to DNA and Lipid in Coke Oven Workers. Environmental Science

492 & Technology 2013;47:7446-7456. <https://doi.org/10.1021/es401639x>

493 Levine, M.E.; Lu, A.T.; Quach, A.; Chen, B.H.; Assimes, T.L.; Bandinelli, S.; Hou, L.;

494 Baccarelli, A.A.; Stewart, J.D.; Li, Y.; Whitsel, E.A.; Wilson, J.G.; Reiner, A.P.; Aviv,

495 A.; Lohman, K.; Liu, Y.; Ferrucci, L.; Horvath, S. An epigenetic biomarker of aging for

496 lifespan and healthspan. Aging (Albany NY) 2018;10:573-591.

497 <https://doi.org/10.18632/aging.101414>

498 Li, J.; Li, X.; Xia, Y.; Fan, H.; Fan, D.; Xi, X.; Ye, Q.; Zhu, Y.; Xiao, C. Subgroup analysis of

499 the relationship between polycyclic aromatic hydrocarbons and rheumatoid arthritis:

500 Data from the National Health and Nutrition Examination Survey, 2003-2014. Sci

501 Total Environ 2021;775:145841. <https://doi.org/10.1016/j.scitotenv.2021.145841>

502 Li, J.; Zhu, X.; Yu, K.; Jiang, H.; Zhang, Y.; Wang, B.; Liu, X.; Deng, S.; Hu, J.; Deng, Q.; Sun,

503 H.; Guo, H.; Zhang, X.; Chen, W.; Yuan, J.; He, M.; Bai, Y.; Han, X.; Liu, B.; Liu, C.;

504 Guo, Y.; Zhang, B.; Zhang, Z.; Hu, F.B.; Gao, W.; Li, L.; Lathrop, M.; Laprise, C.;

505 Liang, L.; Wu, T. Exposure to Polycyclic Aromatic Hydrocarbons and Accelerated

506 DNA Methylation Aging. Environmental Health Perspectives 2018a;126:067005.

507 <https://doi.org/doi:10.1289/EHP2773>

- 508 Li, Y.; Pan, A.; Wang, D.D.; Liu, X.; Dhana, K.; Franco, O.H.; Kaptoge, S.; Di Angelantonio, E.;
- 509 Stampfer, M.; Willett, W.C.; Hu, F.B. Impact of Healthy Lifestyle Factors on Life
- 510 Expectancies in the US Population. *Circulation* 2018b;138:345-355.
- 511 <https://doi.org/10.1161/circulationaha.117.032047>
- 512 Li, Y.; Schoufour, J.; Wang, D.D.; Dhana, K.; Pan, A.; Liu, X.; Song, M.; Liu, G.; Shin, H.J.;
- 513 Sun, Q.; Al-Shaar, L.; Wang, M.; Rimm, E.B.; Hertzmark, E.; Stampfer, M.J.; Willett,
- 514 W.C.; Franco, O.H.; Hu, F.B. Healthy lifestyle and life expectancy free of cancer,
- 515 cardiovascular disease, and type 2 diabetes: prospective cohort study. *BMJ*
- 516 2020;368:l6669. <https://doi.org/10.1136/bmj.l6669>
- 517 Liu, Z.; Kuo, P.L.; Horvath, S.; Crimmins, E.; Ferrucci, L.; Levine, M. A new aging measure
- 518 captures morbidity and mortality risk across diverse subpopulations from NHANES IV:
- 519 A cohort study. *PLoS Med* 2018;15:e1002718.
- 520 <https://doi.org/10.1371/journal.pmed.1002718>
- 521 McClean, M.D.; Rinehart, R.D.; Ngo, L.; Eisen, E.A.; Kelsey, K.T.; Herrick, R.F. Inhalation and
- 522 dermal exposure among asphalt paving workers. *Ann Occup Hyg* 2004;48:663-671.
- 523 <https://doi.org/10.1093/annhyg/meh062>
- 524 Motorykin, O.; Santiago-Delgado, L.; Rohlman, D.; Schrlau, J.E.; Harper, B.; Harris, S.;
- 525 Harding, A.; Kile, M.L.; Massey Simonich, S.L. Metabolism and excretion rates of
- 526 parent and hydroxy-PAHs in urine collected after consumption of traditionally smoked
- 527 salmon for Native American volunteers. *Science of The Total Environment*
- 528 2015;514:170-177. <https://doi.org/https://doi.org/10.1016/j.scitotenv.2015.01.083>

- 529 Pavanello, S.; Campisi, M.; Mastrangelo, G.; Hoxha, M.; Bollati, V. The effects of everyday-  
530 life exposure to polycyclic aromatic hydrocarbons on biological age indicators.  
531 Environ Health 2020;19:128. <https://doi.org/10.1186/s12940-020-00669-9>
- 532 Qiao, Y.; Li, Q.; Du, H.-Y.; Wang, Q.-W.; Huang, Y.; Liu, W. Airborne polycyclic aromatic  
533 hydrocarbons trigger human skin cells aging through aryl hydrocarbon receptor.  
534 Biochemical and Biophysical Research Communications 2017;488:445-452.  
535 <https://doi.org/https://doi.org/10.1016/j.bbrc.2017.04.160>
- 536 Robinson, O.; Chadeau Hyam, M.; Karaman, I.; Climaco Pinto, R.; Ala-Korpela, M.; Handakas,  
537 E.; Fiorito, G.; Gao, H.; Heard, A.; Jarvelin, M.R.; Lewis, M.; Pazoki, R.; Polidoro, S.;  
538 Tzoulaki, I.; Wielscher, M.; Elliott, P.; Vineis, P. Determinants of accelerated  
539 metabolomic and epigenetic aging in a UK cohort. Aging Cell 2020;19:e13149.  
540 <https://doi.org/10.1111/accel.13149>
- 541 Shin, H.H.; Maquiling, A.; Thomson, E.M.; Park, I.W.; Stieb, D.M.; Dehghani, P. Sex-  
542 difference in air pollution-related acute circulatory and respiratory mortality and  
543 hospitalization. Sci Total Environ 2022;806:150515.  
544 <https://doi.org/10.1016/j.scitotenv.2021.150515>
- 545 Stallings-Smith, S.; Mease, A.; Johnson, T.M.; Arikawa, A.Y. Exploring the association  
546 between polycyclic aromatic hydrocarbons and diabetes among adults in the United  
547 States. Environmental Research 2018;166:588-594.  
548 <https://doi.org/https://doi.org/10.1016/j.envres.2018.06.041>

- 549 Tu, R.; Hou, J.; Liu, X.; Li, R.; Dong, X.; Pan, M.; Mao, Z.; Huo, W.; Chen, G.; Guo, Y.; Li, S.;
- 550 Wang, C. Physical activity attenuated association of air pollution with estimated 10-
- 551 year atherosclerotic cardiovascular disease risk in a large rural Chinese adult
- 552 population: A cross-sectional study. *Environ Int* 2020;140:105819.
- 553 <https://doi.org/10.1016/j.envint.2020.105819>
- 554 Veyrand, B.; Sirot, V.; Durand, S.; Pollono, C.; Marchand, P.; Dervilly-Pinel, G.; Tard, A.;
- 555 Leblanc, J.C.; Le Bizec, B. Human dietary exposure to polycyclic aromatic
- 556 hydrocarbons: results of the second French Total Diet Study. *Environ Int* 2013;54:11-
- 557 17. <https://doi.org/10.1016/j.envint.2012.12.011>
- 558 Wang, L.; Hou, J.; Hu, C.; Zhou, Y.; Sun, H.; Zhang, J.; Li, T.; Gao, E.; Wang, G.; Chen, W.;
- 559 Yuan, J. Mediating factors explaining the associations between polycyclic aromatic
- 560 hydrocarbons exposure, low socioeconomic status and diabetes: A structural
- 561 equation modeling approach. *Science of The Total Environment* 2019;648:1476-1483.
- 562 <https://doi.org/https://doi.org/10.1016/j.scitotenv.2018.08.255>
- 563 You, Y.; Luo, J.; Elstgeest, L.E.M.; Zhang, Y.; Tan, S.S.; Raat, H. Associations between
- 564 health indicators and sleep duration of American adults: NHANES 2011-16. *Eur J*
- 565 *Public Health* 2021;31:1204-1210. <https://doi.org/10.1093/eurpub/ckab172>
- 566 Zhang, Y.; Ding, J.; Shen, G.; Zhong, J.; Wang, C.; Wei, S.; Chen, C.; Chen, Y.; Lu, Y.; Shen,
- 567 H.; Li, W.; Huang, Y.; Chen, H.; Su, S.; Lin, N.; Wang, X.; Liu, W.; Tao, S. Dietary and
- 568 inhalation exposure to polycyclic aromatic hydrocarbons and urinary excretion of



569 monohydroxy metabolites--a controlled case study in Beijing, China. Environ Pollut  
570 2014;184:515-522. <https://doi.org/10.1016/j.envpol.2013.10.005>

571 Zhang, Y.B.; Chen, C.; Pan, X.F.; Guo, J.; Li, Y.; Franco, O.H.; Liu, G.; Pan, A. Associations  
572 of healthy lifestyle and socioeconomic status with mortality and incident  
573 cardiovascular disease: two prospective cohort studies. BMJ 2021;373:n604.  
574 <https://doi.org/10.1136/bmj.n604>

575 Zhu, H.; Martinez-Moral, M.P.; Kannan, K. Variability in urinary biomarkers of human  
576 exposure to polycyclic aromatic hydrocarbons and its association with oxidative  
577 stress. Environ Int 2021;156:106720. <https://doi.org/10.1016/j.envint.2021.106720>  
578  
579

580 **Table 1**  
 581 Basic characteristics of study participants in total and by sex.

| Characteristics                             | Total<br>(N=2579) | Male<br>(N=1287) | Female<br>(N=1292) |
|---------------------------------------------|-------------------|------------------|--------------------|
| Chronological age, years                    | 48.2 ± 17.6       | 49.1 ± 17.3      | 47.2 ± 17.9        |
| 20-39 years                                 | 920 (37.9)        | 423 (36.7)       | 497 (39.1)         |
| 40-59 years                                 | 878 (41.0)        | 461 (43.2)       | 417 (38.9)         |
| 60-84 years                                 | 781 (21.1)        | 403 (20.1)       | 378 (22.0)         |
| Race/ethnicity                              |                   |                  |                    |
| Non-Hispanic White                          | 1329 (72.1)       | 684 (73.5)       | 645 (70.8)         |
| Non-Hispanic Black                          | 454 (9.8)         | 211 (8.3)        | 243 (11.2)         |
| Mexican American                            | 517 (8.2)         | 263 (9.3)        | 254 (7.2)          |
| Others                                      | 279 (9.9)         | 129 (8.9)        | 150 (10.9)         |
| Education level                             |                   |                  |                    |
| < High school                               | 697 (17.1)        | 350 (17.2)       | 347 (16.9)         |
| High school/general educational development | 623 (24.8)        | 323 (26.3)       | 300 (23.4)         |
| > High school                               | 1259 (58.1)       | 614 (56.5)       | 645 (59.7)         |
| Poverty income ratio                        | 2.7 ± 1.6         | 2.8 ± 1.6        | 2.6 ± 1.6          |
| <1                                          | 460 (12.3)        | 191 (9.8)        | 269 (14.6)         |
| 1-3                                         | 1081 (35.6)       | 551 (35.6)       | 530 (35.6)         |
| ≥3                                          | 1038 (52.1)       | 545 (54.6)       | 493 (49.7)         |
| Drinking (1 point)                          | 2275 (91.7)       | 1141 (91.2)      | 1134 (92.3)        |
| Smoking (1 point)                           | 1377 (52.9)       | 580 (47.3)       | 797 (58.4)         |
| Body mass index (1 point)                   | 667 (26.2)        | 320 (26.5)       | 347 (32.5)         |
| Physical activity (1 point)                 | 819 (46.7)        | 472 (53.4)       | 347 (40.0)         |
| Diet (1 point)                              | 1040 (39.5)       | 473 (34.4)       | 567 (44.5)         |
| Lifestyle index                             |                   |                  |                    |
| 0                                           | 62 (2.2)          | 31 (2.6)         | 31 (1.9)           |
| 1                                           | 433 (16.7)        | 250 (18.9)       | 183 (14.5)         |
| 2                                           | 912 (34.8)        | 471 (35.1)       | 441 (34.6)         |
| 3                                           | 804 (30.3)        | 364 (28.9)       | 440 (31.6)         |
| 4                                           | 331 (14.3)        | 153 (12.8)       | 178 (15.8)         |
| 5                                           | 37 (1.7)          | 18 (1.7)         | 19 (1.7)           |
| Lifestyle category                          |                   |                  |                    |
| Unhealthy                                   | 495 (18.9)        | 281 (21.5)       | 214 (16.4)         |
| Middle                                      | 1716 (65.1)       | 835 (64.0)       | 881 (66.1)         |
| Healthy                                     | 368 (16.0)        | 171 (14.5)       | 197 (17.4)         |
| OH-PAHs                                     |                   |                  |                    |
| 1-NAP <sup>a</sup>                          | 3.1 ± 1.3         | 3.1 ± 1.3        | 3.0 ± 1.3          |
| 2-NAP <sup>a</sup>                          | 3.5 ± 1.0         | 3.4 ± 1.0        | 3.5 ± 1.0          |
| 2-FLU <sup>a</sup>                          | 0.9 ± 0.9         | 1.0 ± 1.0        | 0.9 ± 0.9          |
| 3-FLU <sup>a</sup>                          | 0.0 ± 1.1         | 0.1 ± 1.2        | -0.1 ± 1.1         |

|                    |             |             |             |
|--------------------|-------------|-------------|-------------|
| 1-PHE <sup>a</sup> | 0.2 ± 0.7   | 0.1 ± 0.7   | 0.3 ± 0.6   |
| 2-PHE <sup>a</sup> | -0.6 ± 0.8  | -0.6 ± 0.8  | -0.6 ± 0.7  |
| 3-PHE <sup>a</sup> | -0.3 ± 0.7  | -0.3 ± 0.8  | -0.3 ± 0.7  |
| 1-PYR <sup>a</sup> | -0.3 ± 0.9  | -0.3 ± 0.9  | -0.2 ± 0.9  |
| ∑NAP               | 6.5 ± 2.0   | 6.5 ± 2.1   | 6.6 ± 1.9   |
| ∑FLU               | 0.9 ± 2.0   | 1.0 ± 2.1   | 0.8 ± 1.9   |
| ∑PHE               | -0.6 ± 1.9  | -0.7 ± 2.0  | -0.6 ± 1.9  |
| ∑PYR               | -0.3 ± 0.9  | -0.3 ± 0.9  | -0.2 ± 0.9  |
| ∑OH-PAH            | 6.5 ± 5.8   | 6.5 ± 6.1   | 6.6 ± 5.5   |
| PhenoAge, years    | 42.5 ± 19.6 | 44.2 ± 20.1 | 40.8 ± 19.0 |

582 Abbreviations: OH-PAHs, monohydroxy polycyclic aromatic hydrocarbons; 1-NAP, 1-  
583 hydroxynaphthalene; 2-NAP, 1-hydroxynaphthalene; 2-FLU, 2-hydroxyfluorene; 3-FLU, 3-  
584 hydroxyfluorene; 1-PHE, 1-hydroxyphenanthrene; 2-PHE, 2-hydroxyphenanthrene; 3-PHE,  
585 3-hydroxyphenanthrene; 1-PYR, 1-hydroxypyrene; ∑NAP, sum of 1-NAP and 2-NAP; ∑FLU,  
586 sum of 2-FLU and 3-FLU; ∑PHE, sum of 1-PHE, 2-PHE and 3-PHE; ∑PYR, 1-PYR; ∑OH-  
587 PAH, sum of 1-NAP, 2-NAP, 2-FLU, 3-FLU, 1-PHE, 2-PHE, 3-PHE and 1-PYR; PhenoAge,  
588 Phenotypic Age.  
589 Data are shown as mean ± standard deviation or numbers (weighted percentages). Percentages  
590 may not sum to 100 because of rounding. There were 2, 122, 30, and 50 participants with  
591 missing data on smoking, drinking, body mass index, physical activity, and diet, respectively.  
592 Details on definitions of “1 point” for smoking, drinking, body mass index, physical activity,  
593 and diet, the lifestyle index, and the lifestyle category are provided in the method.  
594 <sup>a</sup> Data are presented as mean ± standard deviation after adjusting for creatinine and  
595 logarithmic conversion.  
596

597 **Table 2**

598 Associations of urinary OH-PAHs and lifestyle with PhenoAge.Accel, respectively.

|                           | <b>Model 1</b>       |          | <b>Model 2</b>       |          |
|---------------------------|----------------------|----------|----------------------|----------|
|                           | <b>β (95%CI)</b>     | <b>P</b> | <b>β (95%CI)</b>     | <b>P</b> |
| <b>OH-PAHs</b>            |                      |          |                      |          |
| ∑NAP                      | 0.37 (0.26, 0.48)    | <0.001   | 0.30 (0.19, 0.42)    | <0.001   |
| ∑FLU                      | 0.43 (0.32, 0.54)    | <0.001   | 0.35 (0.24, 0.46)    | <0.001   |
| ∑PHE                      | 0.26 (0.14, 0.38)    | <0.001   | 0.22 (0.11, 0.34)    | <0.001   |
| ∑PYR                      | 0.40 (0.14, 0.66)    | 0.002    | 0.26 (0.01, 0.52)    | 0.046    |
| ∑OH-PAH                   | 0.13 (0.09, 0.17)    | <0.001   | 0.11 (0.07, 0.15)    | <0.001   |
| <b>Lifestyle category</b> |                      |          |                      |          |
| <b>Unhealthy</b>          | Reference            | —        | Reference            | —        |
| <b>Middle</b>             | -1.89 (-2.48, -1.31) | <0.001   | -1.72 (-2.30, -1.14) | <0.001   |
| <b>Healthy</b>            | -4.24 (-5.01, -3.48) | <0.001   | -3.80 (-4.56, -3.04) | <0.001   |

599 Abbreviations: OH-PAHs, monohydroxy polycyclic aromatic hydrocarbons; CI, confidence  
600 interval; ∑NAP, sum of 1-NAP and 2-NAP; ∑FLU, sum of 2-FLU and 3-FLU; ∑PHE, sum  
601 of 1-PHE, 2-PHE, and 3-PHE; ∑PYR, 1-PYR; ∑OH-PAH, sum of 1-NAP, 2-NAP, 2-FLU, 3-  
602 FLU, 1-PHE, 2-PHE, 3-PHE, and 1-PYR; PhenoAge.Accel, Phenotypic Age Acceleration.  
603 Each OH-PAH was included into the models separately.  
604 Model 1 adjusted for chronological age and sex.  
605 Model 2 additionally adjusted for race/ethnicity, education level, and poverty income ratio  
606 based on Model 1.
